# Supplementary material for: Electrooxidation and Development of a Highly Sensitive Electrochemical Probe for Trace Determination of the Steroid 11-Desoxycorticosterone Drug Residues in Water
Source: Hindawi journal article supplement (doi:10.1155/2022/2074908), 2022-05-04
Supplement: f1 [file 2074908.f1.docx]

**Supplemental Information’s**

**SI. 1`:** Chemical structure of 11-desoxycorticosterone

**SI. 2:** Standard addition plot of 11- desoxycorticosterone at different concentrationsof DCS at GCE *vs.* Ag/AgCl electrode. Accumulation time=5 s, pulse amplitude = 0.07 V in B-R buffer (pH= 2-3).
